# Supplementary material for: Production and Biochemical Characterization of Dimeric Recombinant Gremlin-1
Source: MDPI journal article supplement (doi:10.3390/ijms23031151), 2022-01-21
Supplement: s1 [file ijms-1555235-supplementary.pdf › ijms-1555235-supplementary.pdf]

# Production and biochemical characterization of dimeric recombinant Gremlin-1

Stefania Mitola<sup>1\*</sup>, Cosetta Ravelli<sup>1</sup>, Michela Corsini<sup>1</sup>, Alessandra Gianoncelli<sup>1</sup>, Federico Galvagni<sup>2</sup>, Kurt Ballmer-Hofer<sup>3</sup>, Marco Presta<sup>1</sup> and Elisabetta Grillo<sup>1\*</sup>

<sup>1</sup>Department of Molecular and Translational Medicine, University of Brescia, Brescia, 25123, Italy

<sup>2</sup>Department of Biotechnology, Chemistry and Pharmacy, University of Siena, 53100 Siena, Italy

<sup>3</sup>Biomolecular Research; Molecular Cell Biology; Paul Scherrer Institut; Villigen, 5232, Switzerland

**Figure S1**

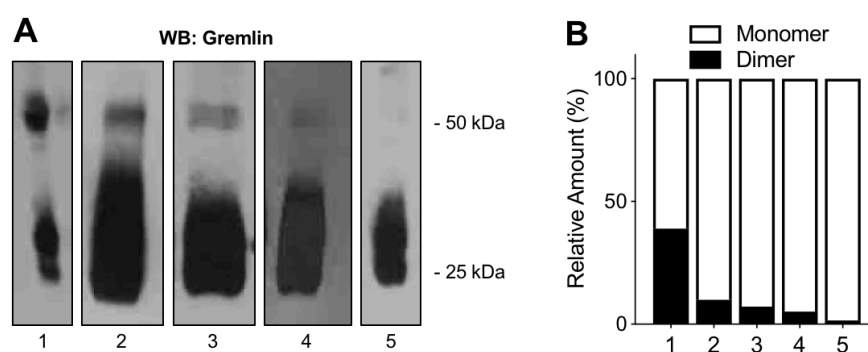

**Analysis of the oligomeric state of recombinant gremlin.** **A**, WB analysis of gremlin oligomeric state by non-reducing SDS-PAGE in 5 distinct batches of recombinant human gremlin produced in mouse myeloma cells. **B**, WB densitometry.
